# Supplementary material for: Negative Regulation of Hepatitis C Virus Specific Immunity Is Highly Heterogeneous and Modulated by Pegylated Interferon-Alpha/Ribavirin Therapy
Source: PLOS journal article supplement (doi:10.1371/journal.pone.0049389), 2012-11-08

# Supplementary Figure 1

Flowchart of patients included in the study.

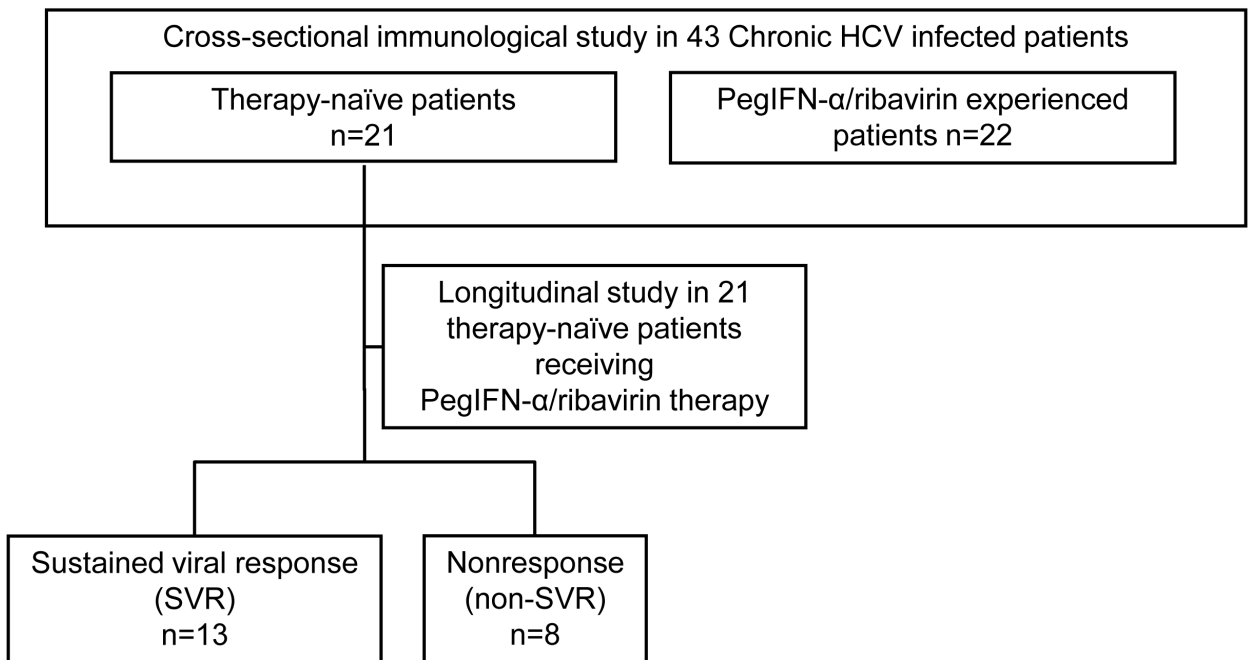

Supplement: S1 (10.1371/journal.pone.0049389.s001) [file journal.pone.0049389.s001]
