# Supplementary material for: Negative Regulation of Hepatitis C Virus Specific Immunity Is Highly Heterogeneous and Modulated by Pegylated Interferon-Alpha/Ribavirin Therapy
Source: PLOS journal article supplement (doi:10.1371/journal.pone.0049389), 2012-11-08

# Supplementary Figure 3

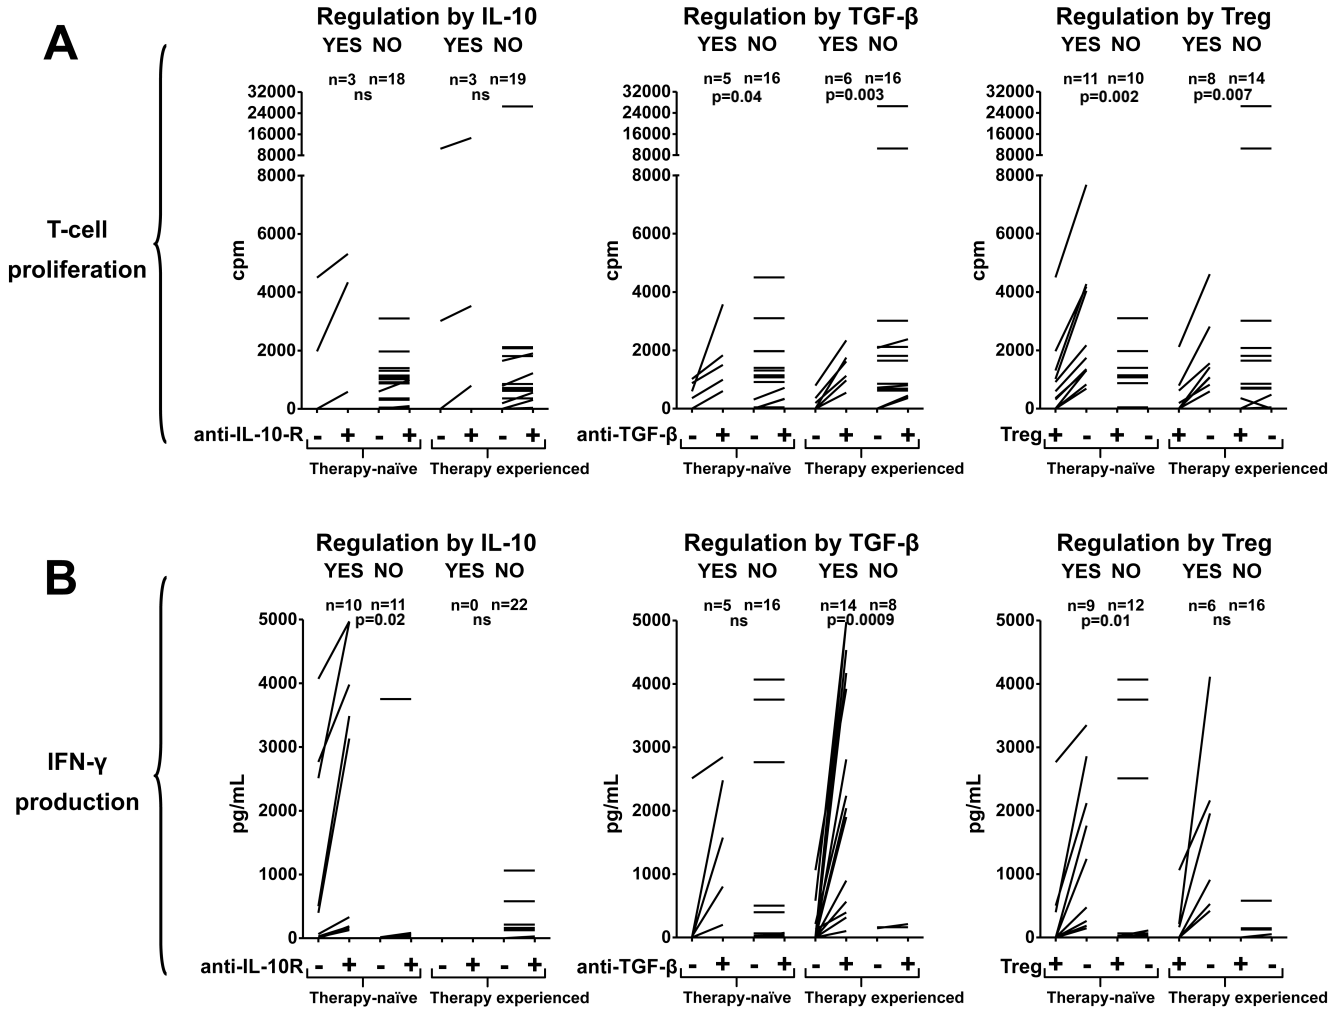

Supplement: S3 (10.1371/journal.pone.0049389.s003) [file journal.pone.0049389.s003]
